# Supplementary material for: Claspin recruits Cdc7 kinase for initiation of DNA replication in human cells
Source: PubMed Central journal article supplement (PMC4945878; doi:10.1038/ncomms12135), 2016-07-12
Supplement: ncomms12135-s1.pdf [file ncomms12135-s1.pdf]

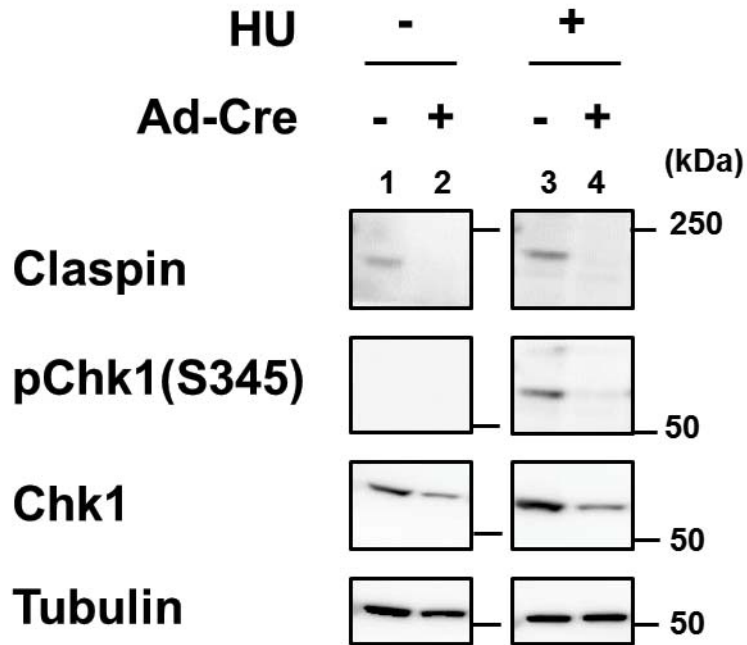

### MEF *Claspin*<sup>f/-</sup> cells

**Supplementary Figure 1 (related to Figure 1). Chk1 activation in response to HU is compromised in *Claspin*<sup>-/-</sup> MEF cells.**

Proteins indicated were examined by western blotting in the whole cell extracts of the *Claspin*<sup>f/-</sup> MEF cells. 2mM HU was added during the last 3 h before the harvest (right) or non-treated (left). Cells were treated with Ad-Cre (+) or untreated (-).

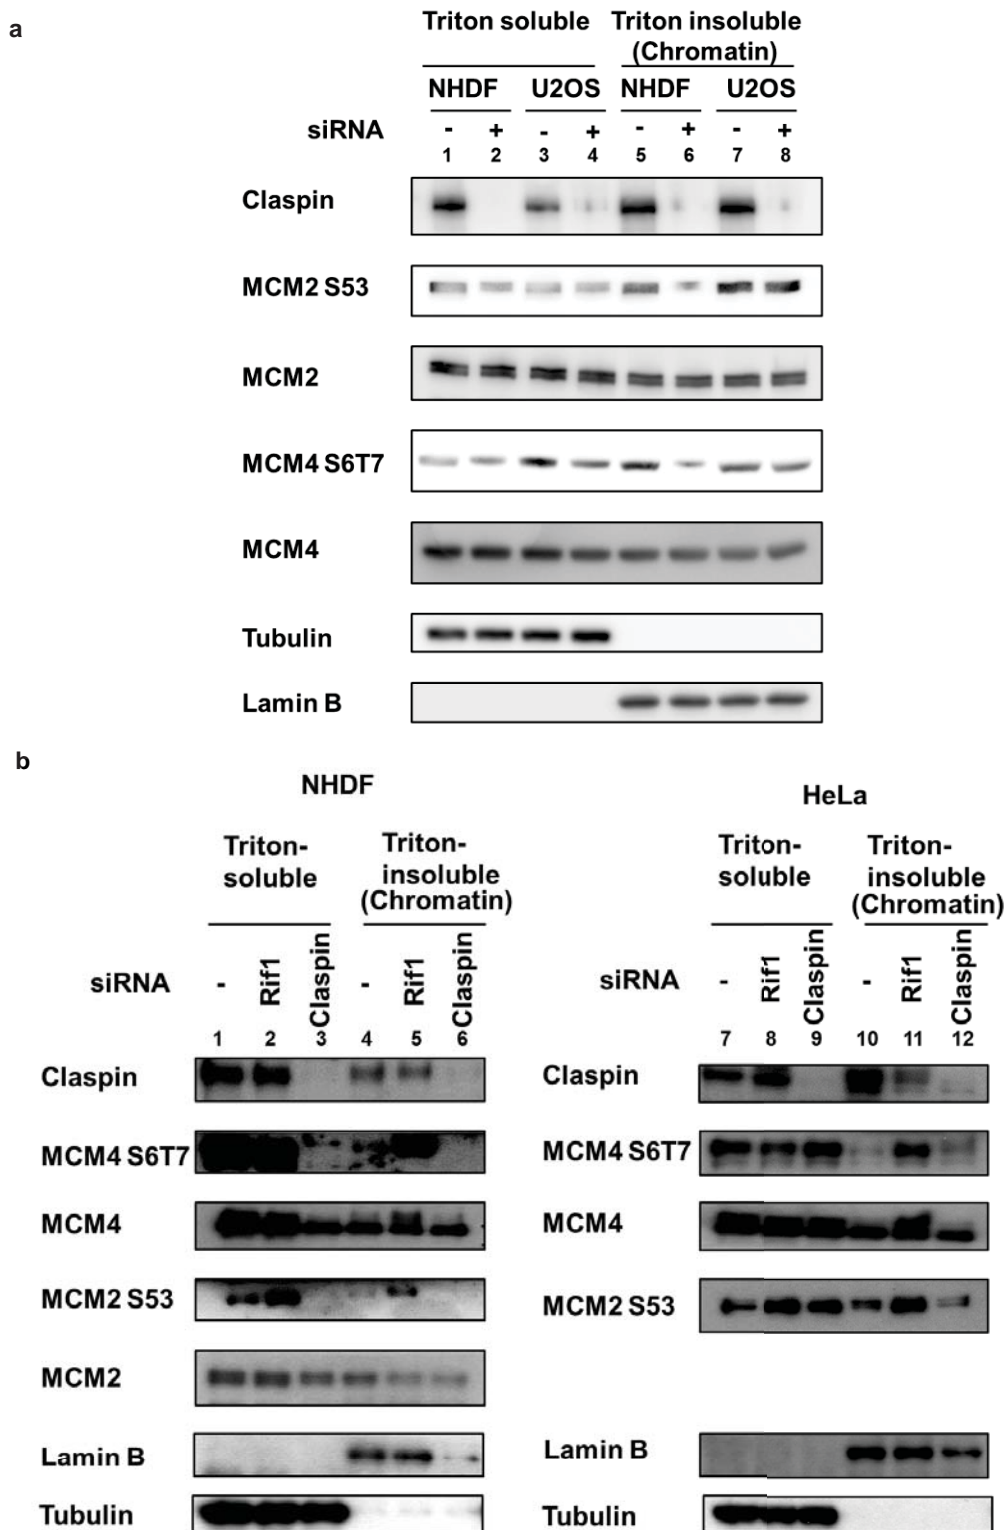

**Supplementary Figure 2 (related to Figure 3). Claspin is required for Cdc7-mediated phosphorylation of Mcm subunits in NHDF but not in cancer cell lines.**

(a) NHDF and U2OS cells were mock-transfected or transfected with *Claspin* siRNA and Triton-soluble and -insoluble fractions were analyzed by western blotting to detect the proteins indicated. (b) NHDF and HeLa cells were mock-transfected or transfected with *Rif1* or *Claspin* siRNA and Triton-soluble and -insoluble fractions were analyzed by western blotting to detect the proteins indicated. It has been known that *Rif1* depletion increases the Cdc7-mediated Mcm phosphorylation<sup>1</sup>.

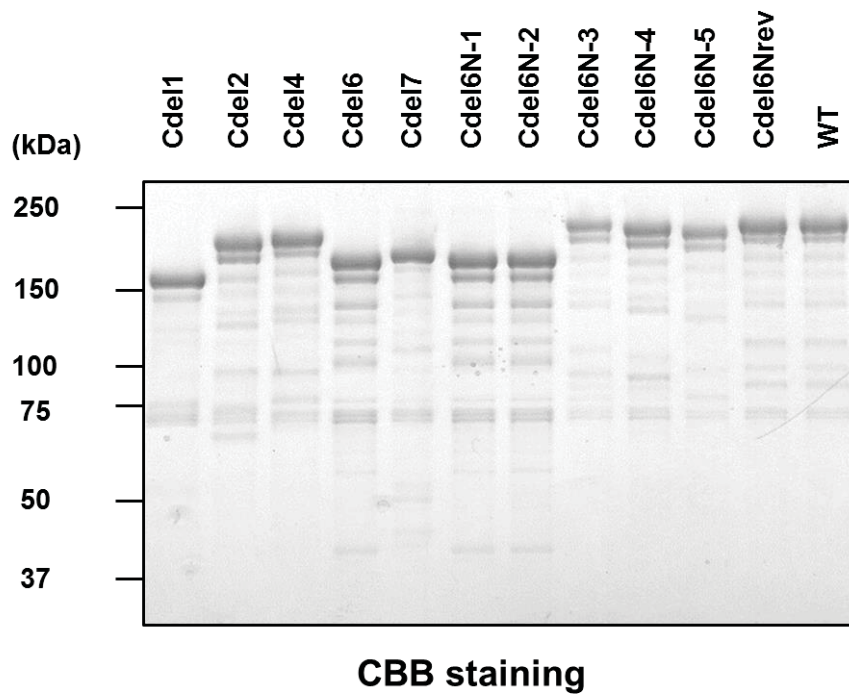

**Supplementary Figure 3 (related to Figure 4). Purification of Claspin derivatives carrying internal deletions in the C-terminal region.**

Each protein was expressed in 293T cells and purified as described in Methods. 2.5  $\mu\text{g}$  of the purified protein fractions were run on 5-20% gradient gel, and stained with CBB.

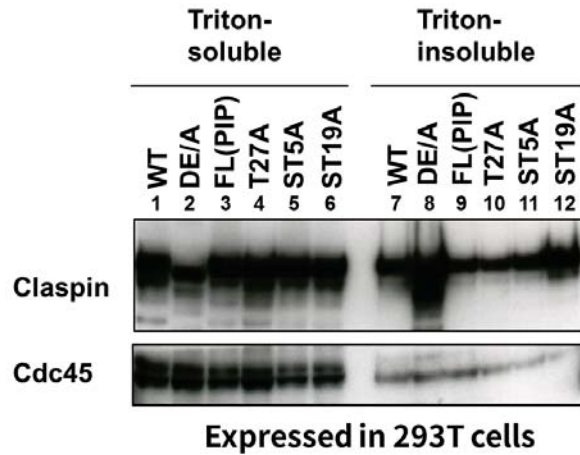

**Supplementary Figure 4 (related to Figure 4) Chromatin binding of various mutant Claspin proteins.**

293T cells were transfected with plasmid DNAs expressing the wild-type, DE/A, PIP, ST27A, ST5A or ST19A Claspin. Triton-soluble and -insoluble fractions were prepared and were analyzed by western blotting to detect the transfected protein (anti-Flag antibody) and Cdc45.

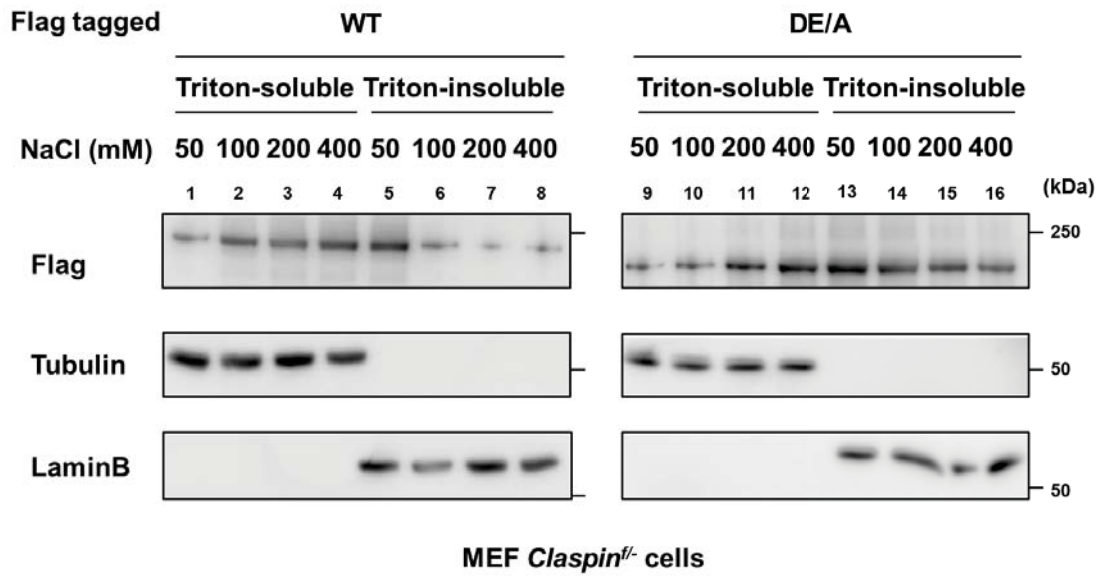

**Supplementary Figure 5 (related to Figure 4). Effect of salt concentration on chromatin binding of wild-type and DE/A mutant Claspin.**

*Claspin*<sup>-/-</sup> MEF cells stably expressing the Flag-tagged wild-type or DE/A mutant Claspin were fractionated into Triton-soluble and -insoluble fractions at different concentrations of NaCl. Each fraction was analyzed by western blotting to detect the proteins indicated.

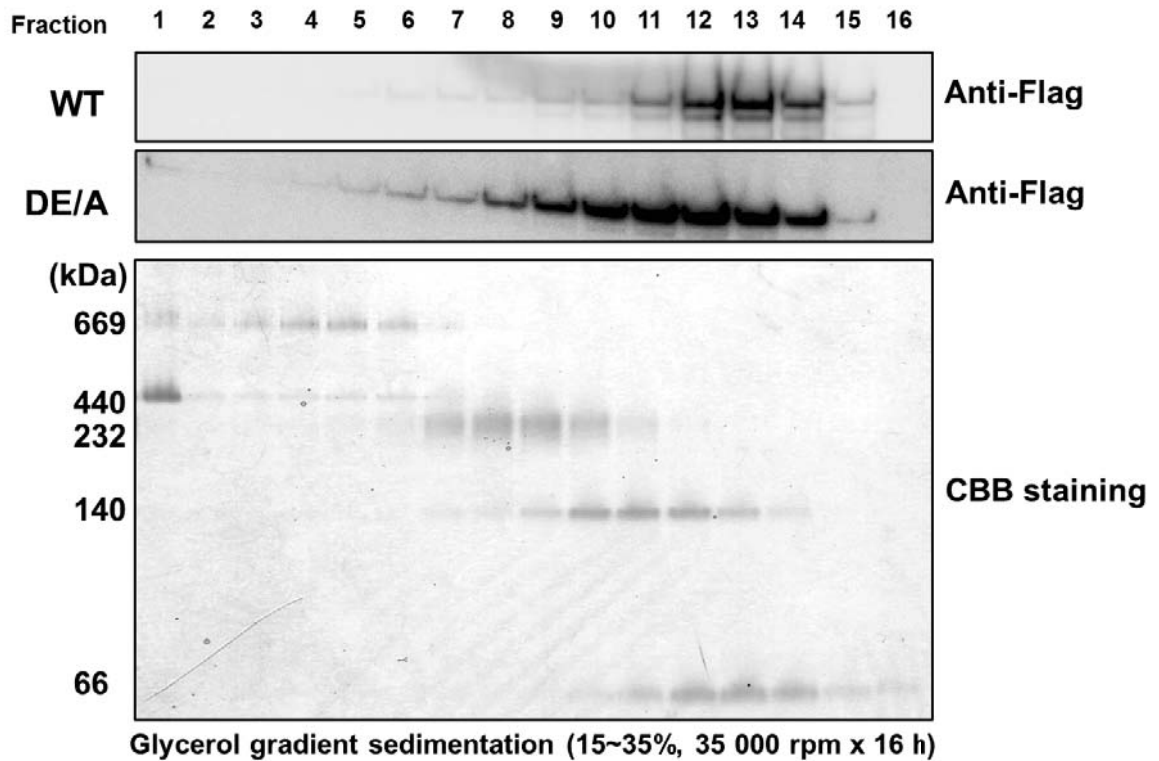

**Supplementary Figure 6 (related to Figures 3 and 4) Glycerol gradient analyses of purified wild-type and DE/A mutant Claspin proteins.**

Six  $\mu\text{g}$  of purified Claspin proteins (wild-type and DE/A) were fractionated by gel filtration column (Superose-6) in SMART system. The buffer used was 20 mM Tris-HCl (pH 7.5), 0.5 mM EDTA, 1 mM DTT, 150 mM NaCl, 0.1 mM PMSF and 0.01% TritonX-100. High molecular weight native marker proteins (GE Healthcare, Inc.) were also fractionated under the same condition. The fractions were analyzed by SDS-PAGE and western blotting with anti-Flag antibody or Coomassie Brilliant Blue (CBB) staining.

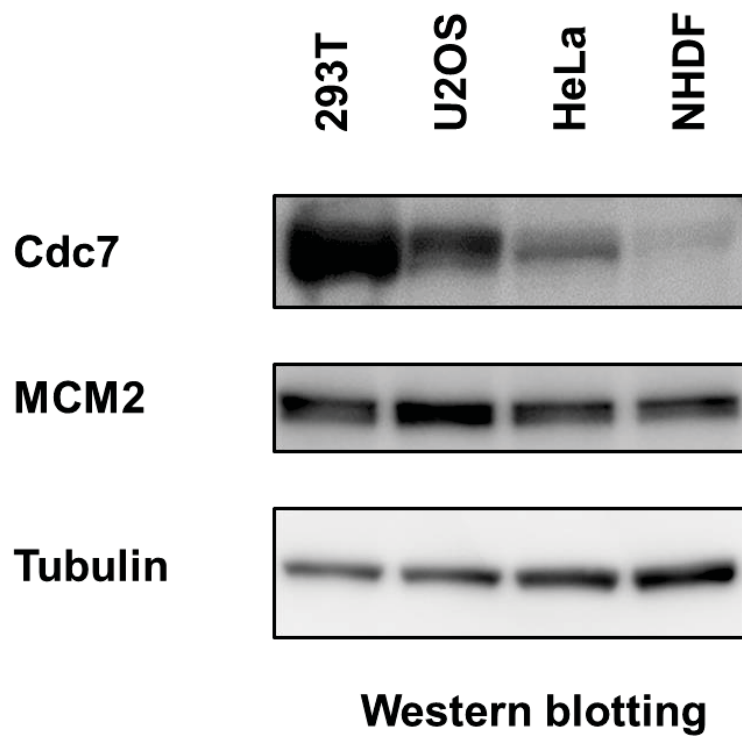

**Supplementary Figure 7 (related to Figure 3). Cdc7 is overexpressed in cancer cell lines.** Whole cell extract of 293T, U2OS, HeLa and NHDF cells were analyzed by western blotting to detect the proteins indicated.

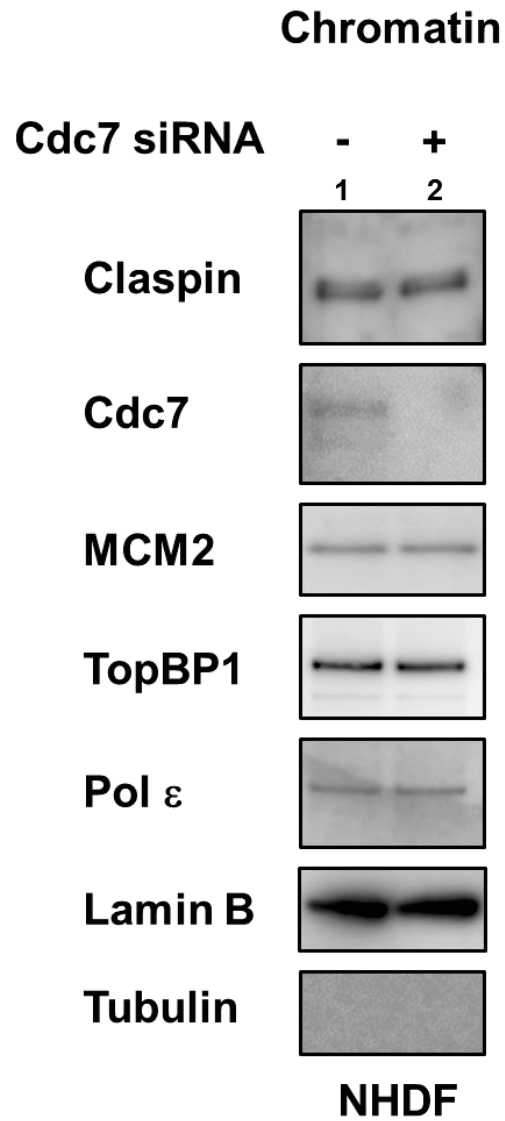

**Supplementary Figure 8 (related to Figure 3). Cdc7 depletion does not affect the Claspin binding to chromatin.**

*Cdc7* was knocked down by siRNA in NHDF cells for 48 h, and cells were fractionated into Triton-soluble and -insoluble fractions. Triton-insoluble fractions were analyzed by western blotting to detect the proteins indicated.



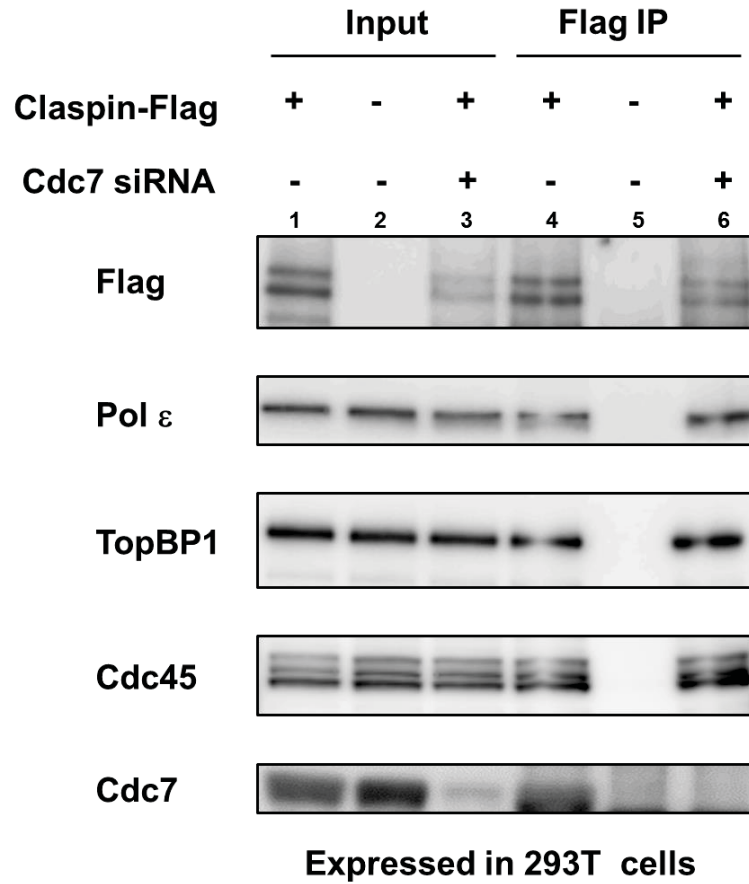

**Supplementary Figure 9 (related to Figures 2 and 3). The binding of Pol ε, TopBP1, and Cdc45 to Claspin is independent of Cdc7.**

*Cdc7* was knockdown by siRNA in 293T cells, and then Flag-tagged Claspin was expressed by transient transfection. The immunoprecipitates with M2 Flag beads were analyzed by western blotting to detect the proteins indicated.

a

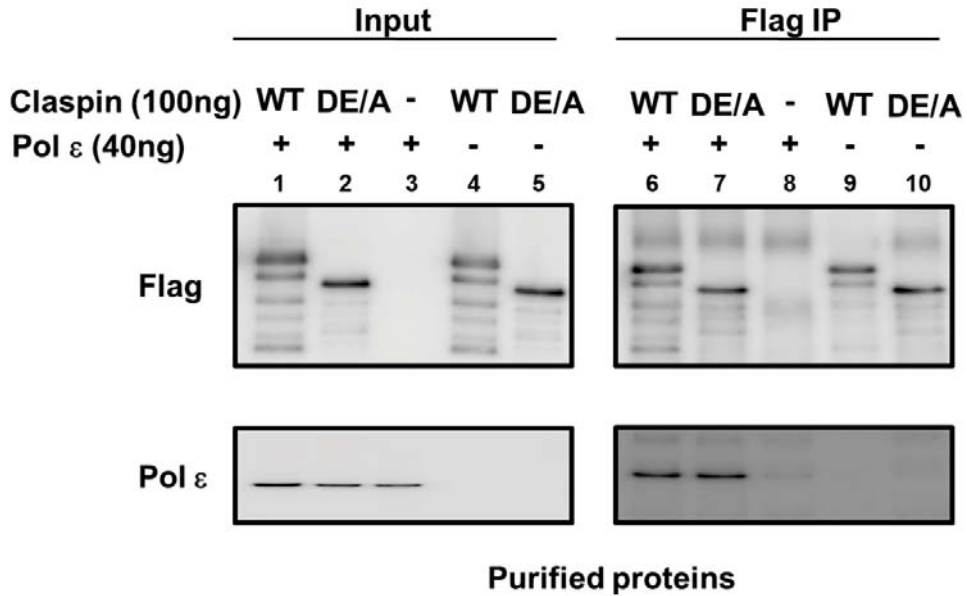

b

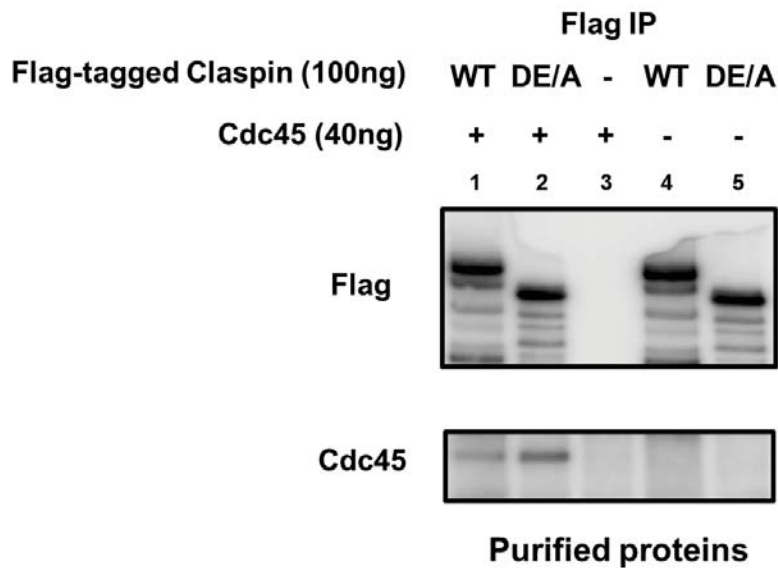

**Supplementary Figure 10 (related to Figures 2 and 3). Pol  $\epsilon$  and Cdc45 interact with Claspin in a manner independent on AP *in vitro*.**

Purified wild-type or DE/A mutant Claspin was mixed with purified Pol  $\epsilon$  (a) or with Cdc45 (b) and pulled down by Dynabeads conjugated with anti-Flag antibody. Immunoprecipitated materials were analyzed by western blotting to detect the proteins indicated.

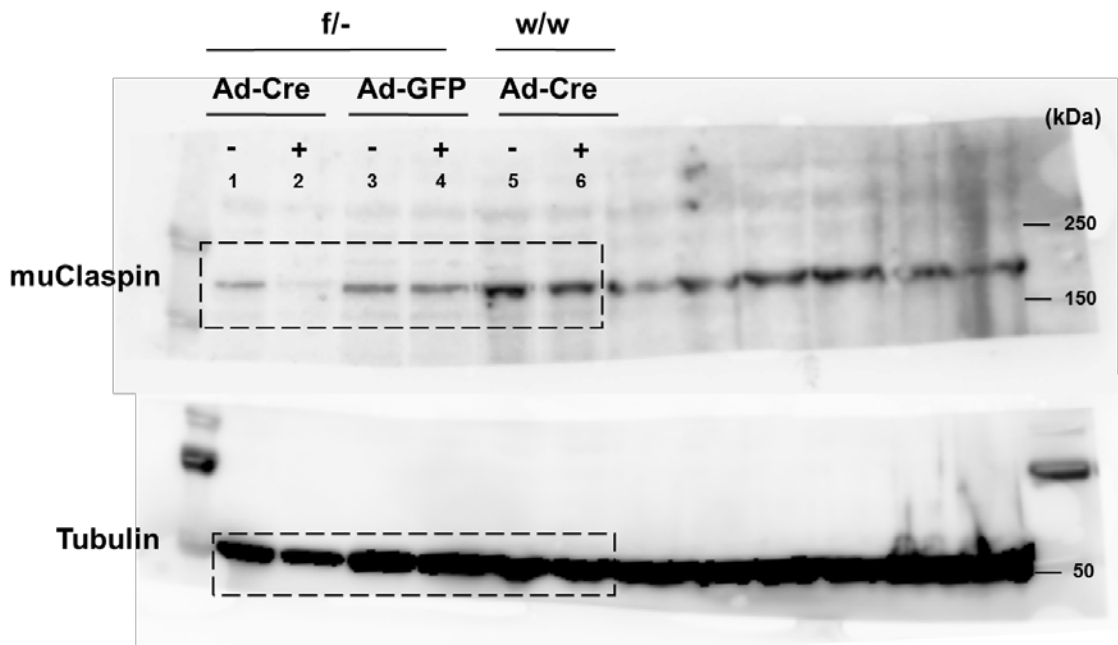

**Supplementary Figure 11. Uncropped scans of blots.**  
 Uncropped scans of Figure 1c.

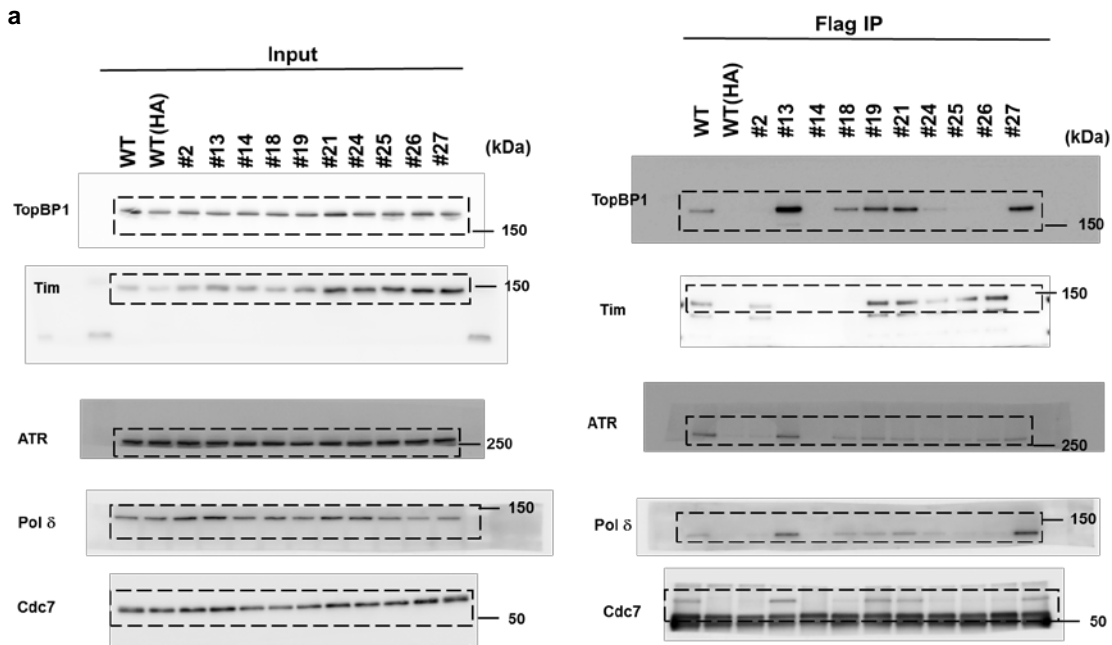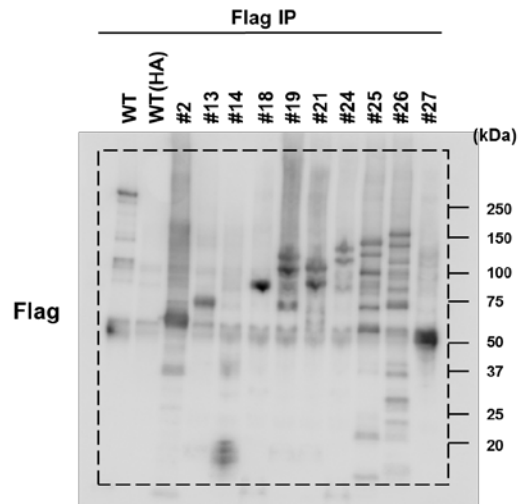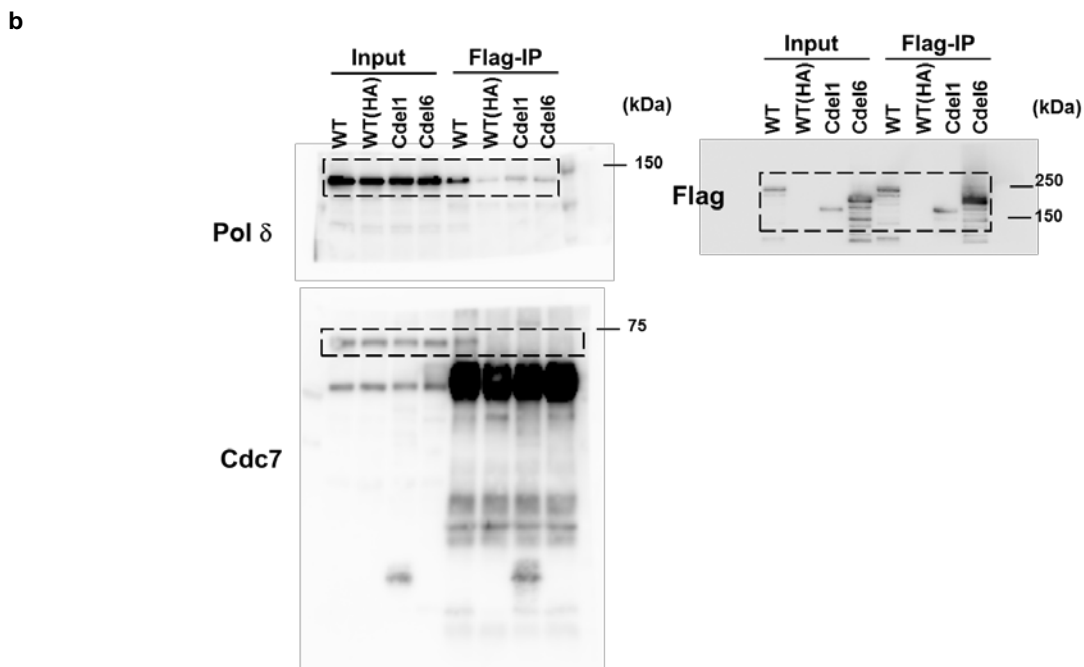

**Supplementary Figure 12. Uncropped scans of the most important blots.**  
 (a) Uncropped scans of Figure 2b. (b) Uncropped scans of Figure 2c.

**a**

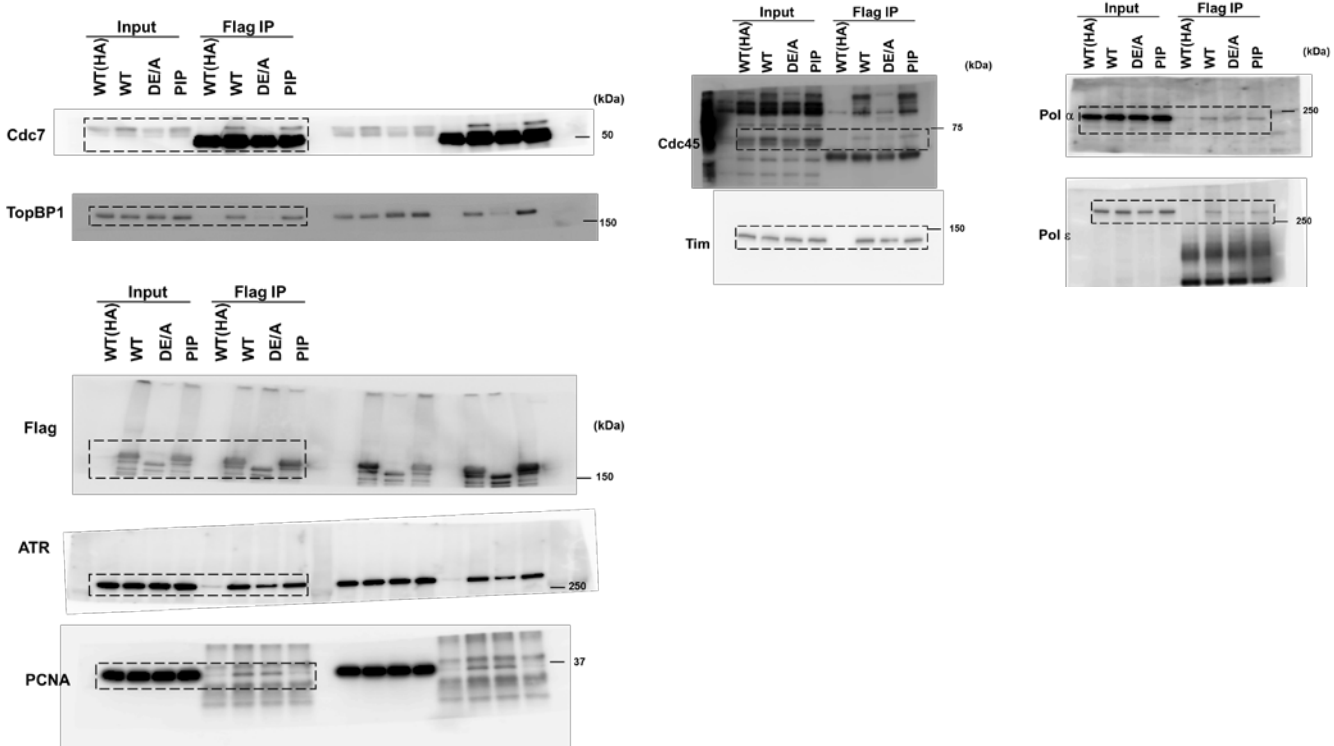

**b**

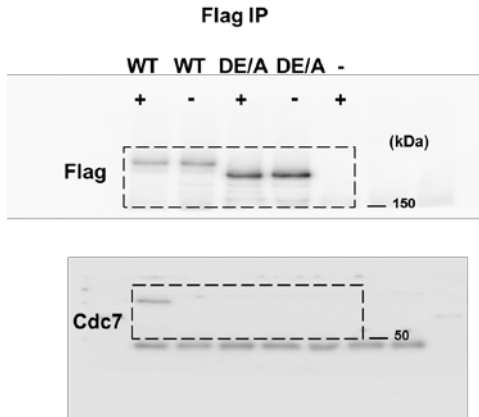

**c**

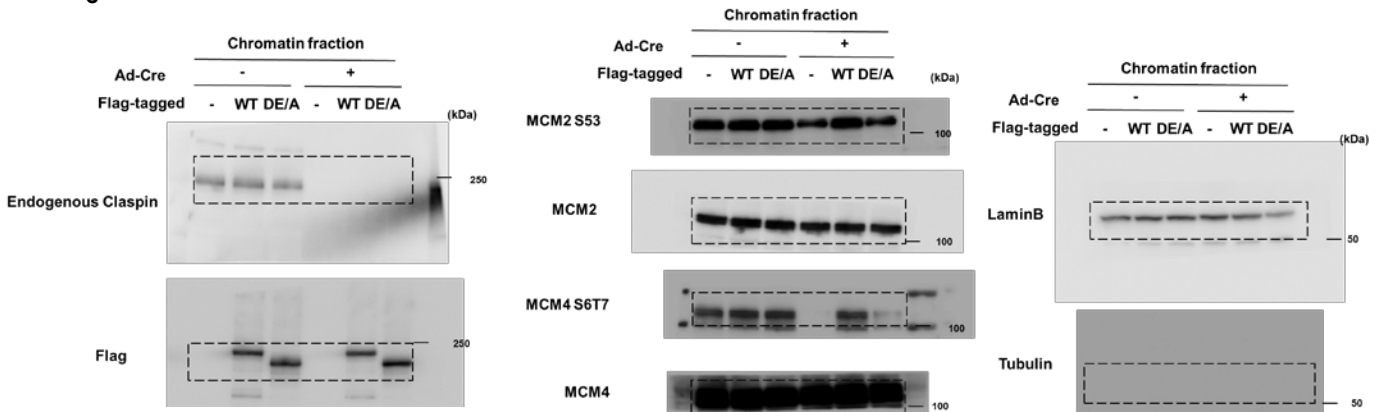

**Supplementary Figure 13. Uncropped scans of the blots.**

(a) Uncropped scans of Figure 3b. (b) Uncropped scans of Figure 3c. (c) Uncropped scans of Figure 3f.

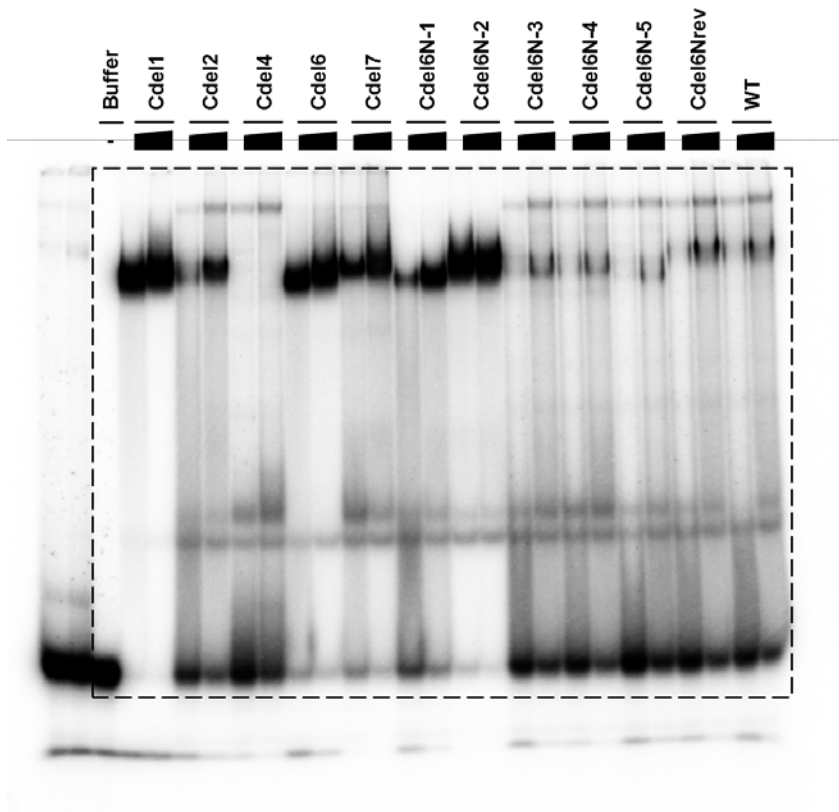

**Supplementary Figure 14. Uncropped scans of the blots.**  
Uncropped scans of Figure 4b.

a

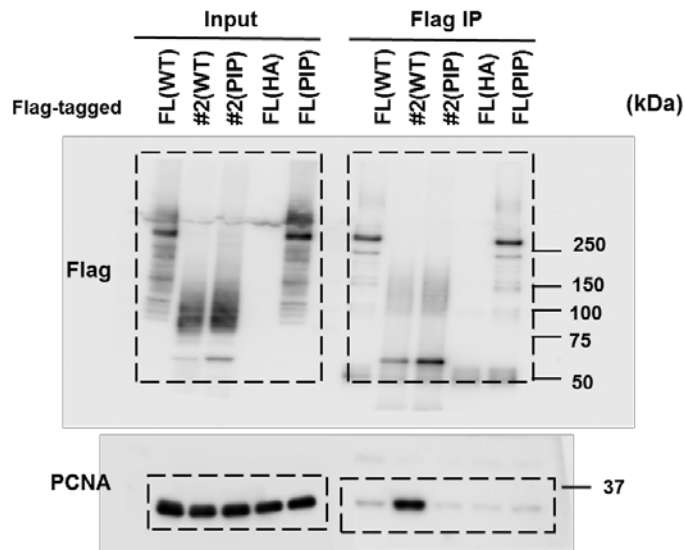

b

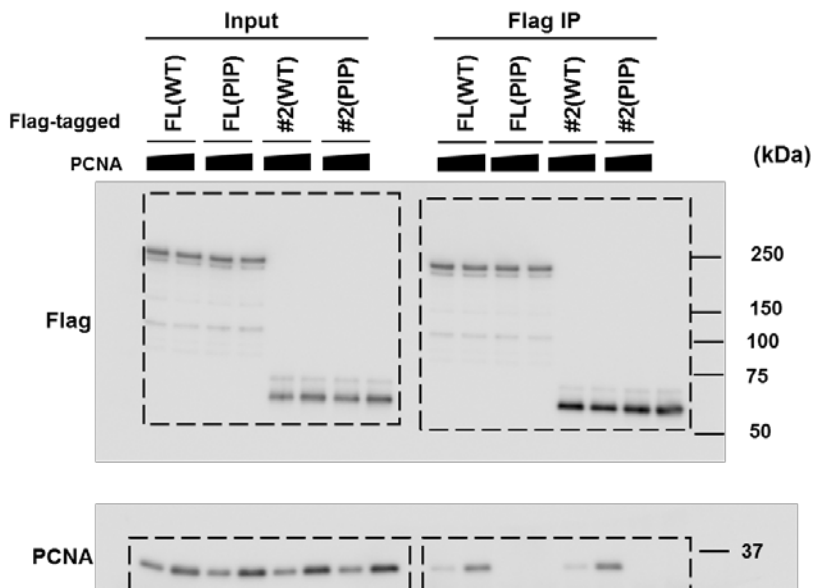

**Supplementary Figure 15. Uncropped scans of the blots.**

(a) Uncropped scans of Figure 5b. (b) Uncropped scans of Figure 5c.

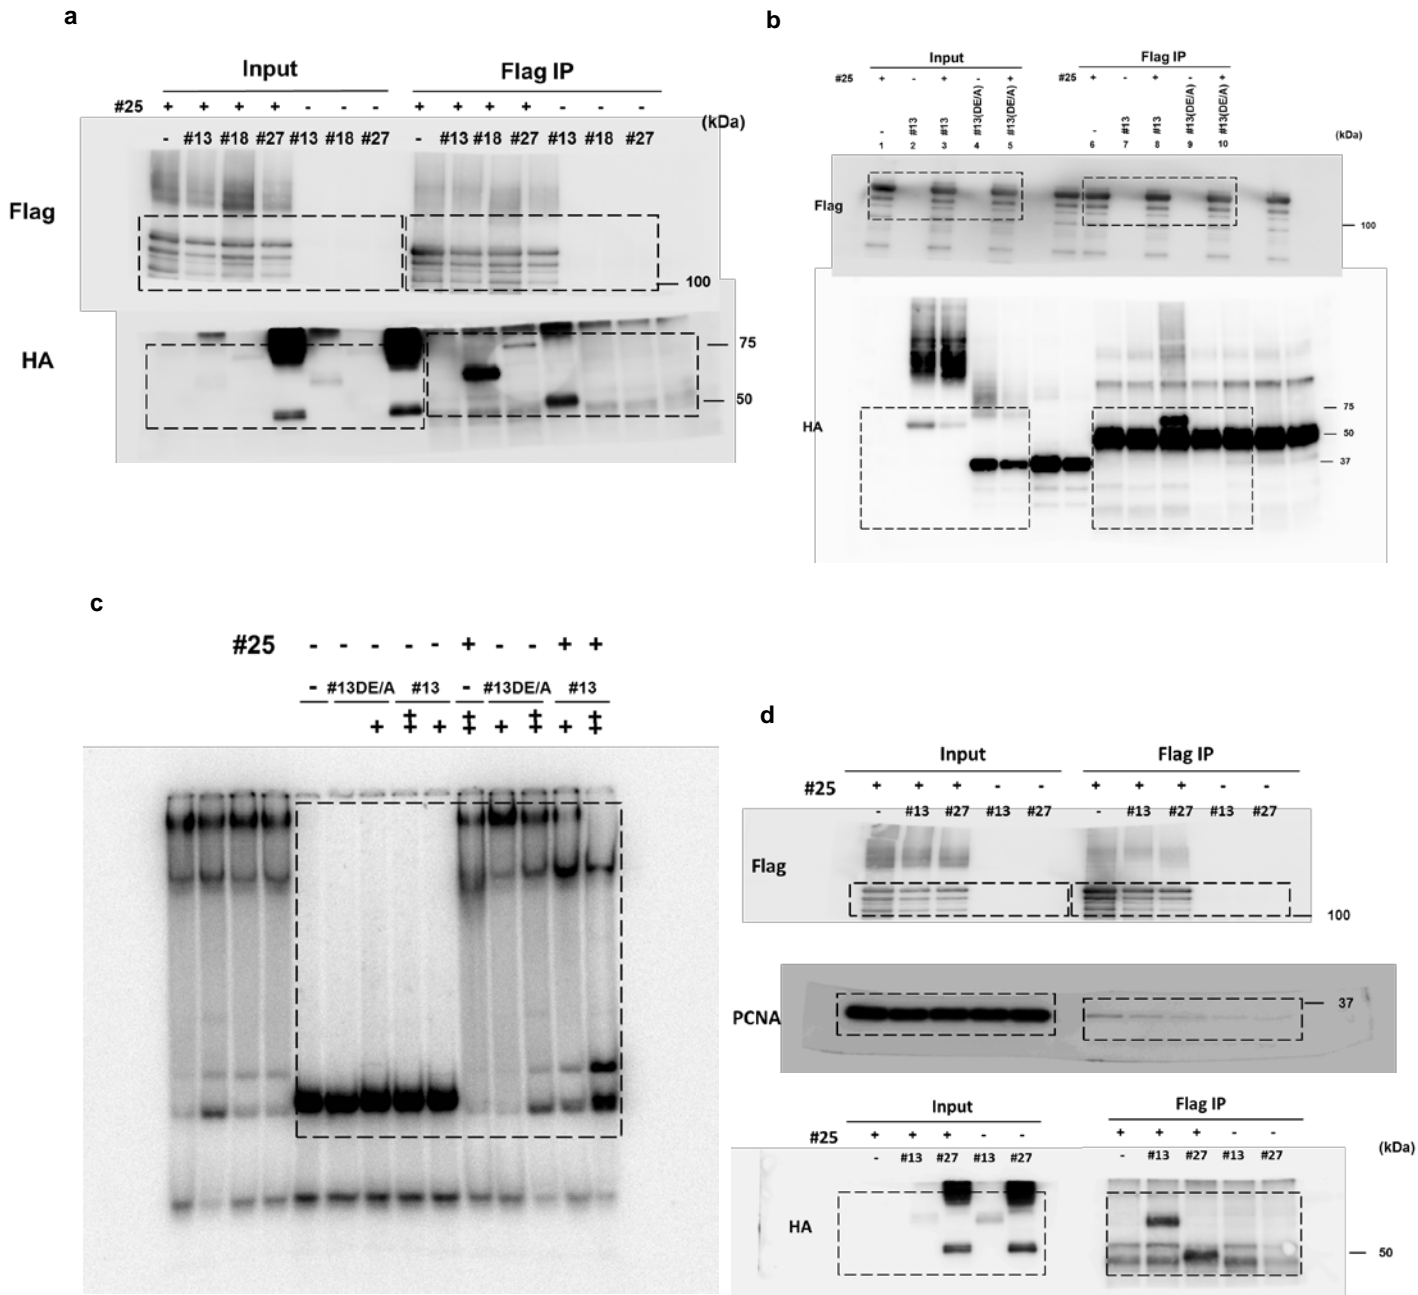

**Supplementary Figure 16. Uncropped scans of the most important blots.**

(a)Uncropped scans of Figure 6a.(b) Uncropped scans of Figure 6b. (c)Uncropped scans of Figure 6c. (d)Uncropped scans of Figure 6d.





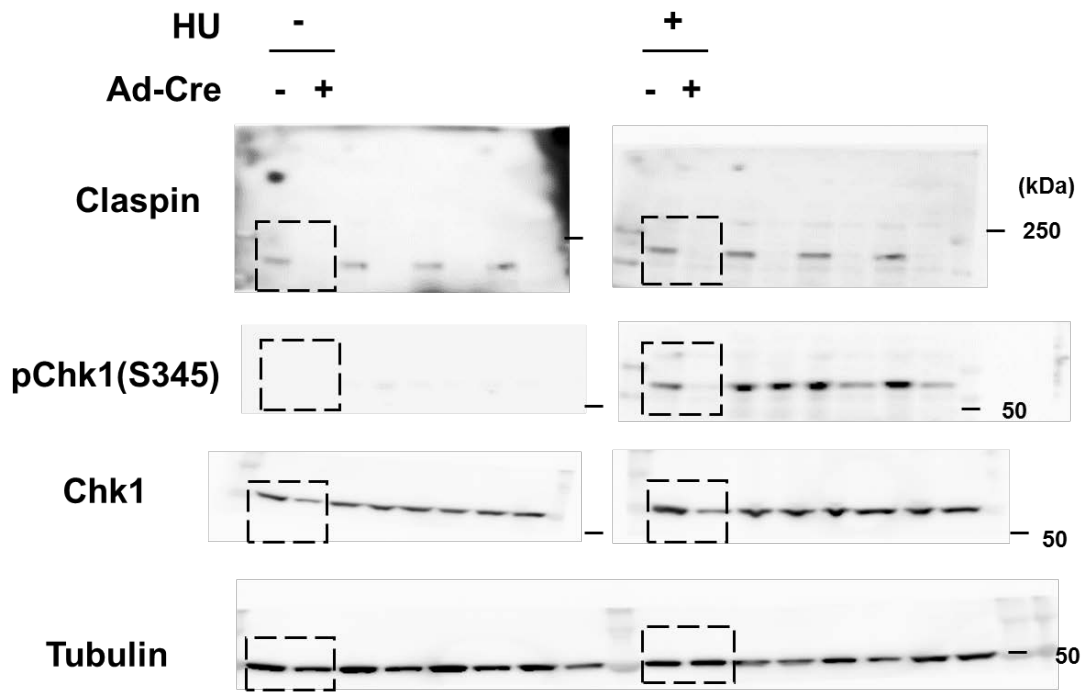

**Supplementary Figure 18. Uncropped scans of the blots.**  
 Uncropped scans of Supplementary Figure 1

a

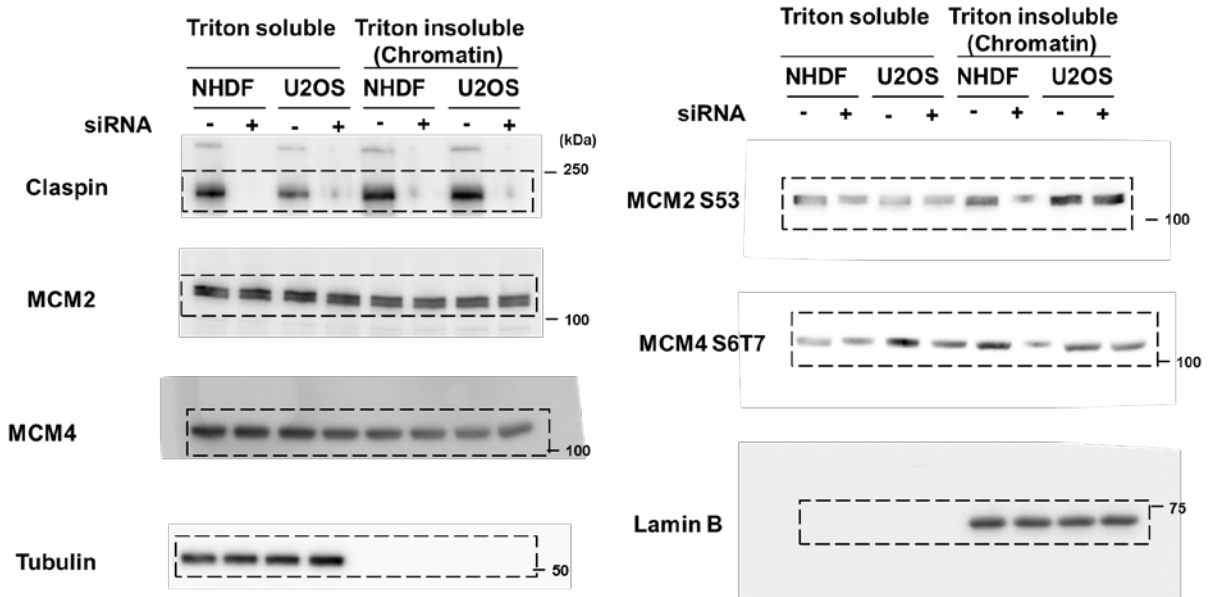

b

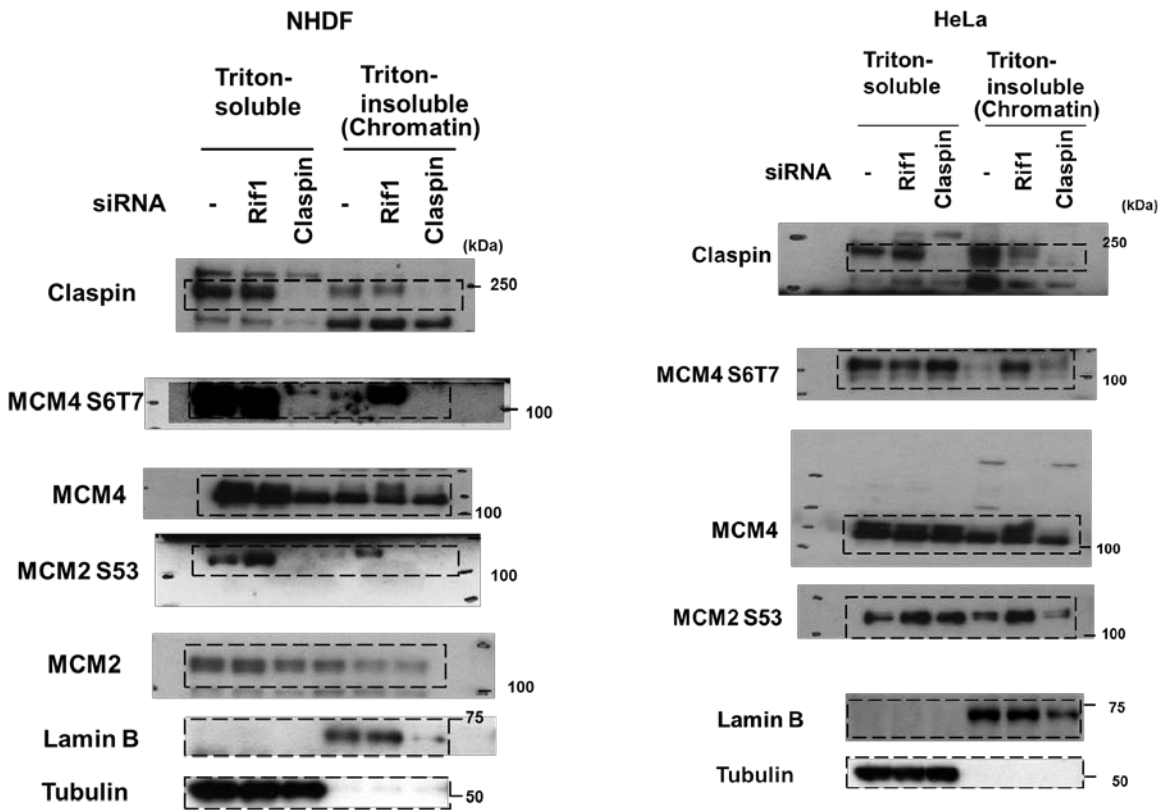

**Supplementary Figure 19. Uncropped scans of the blots.**

(a) Uncropped scans of Supplementary Figure 2a. (b) Uncropped scans of Supplementary Figure 2b.

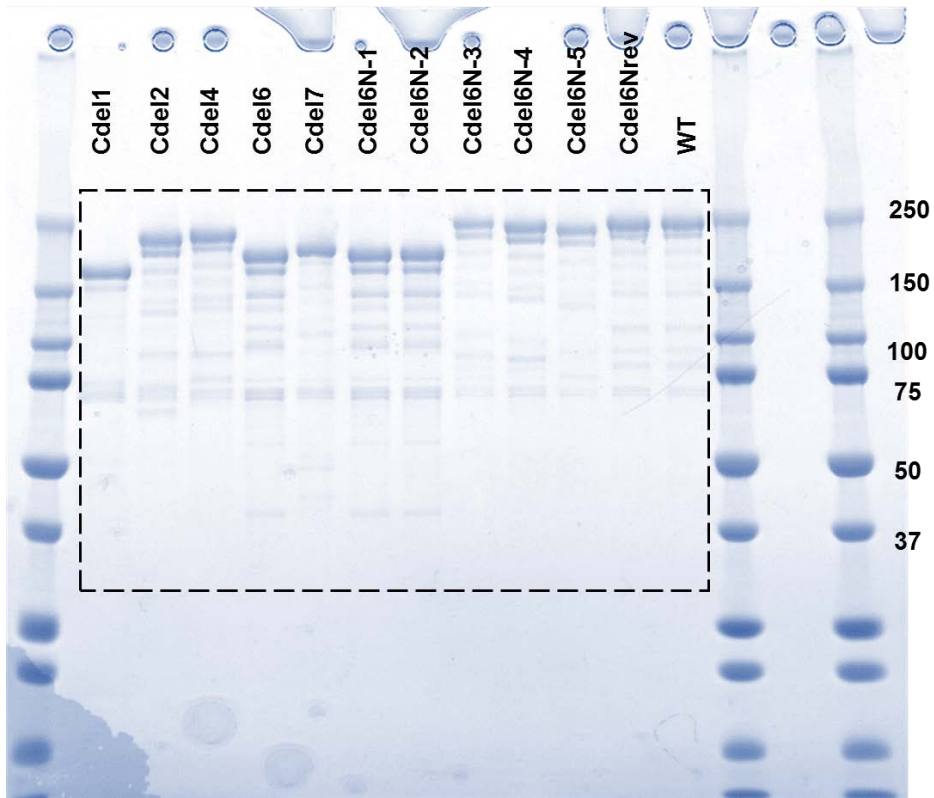

**Supplementary Figure 20. Uncropped scans of the blots.**  
Uncropped scans of Supplementary Figure 3.

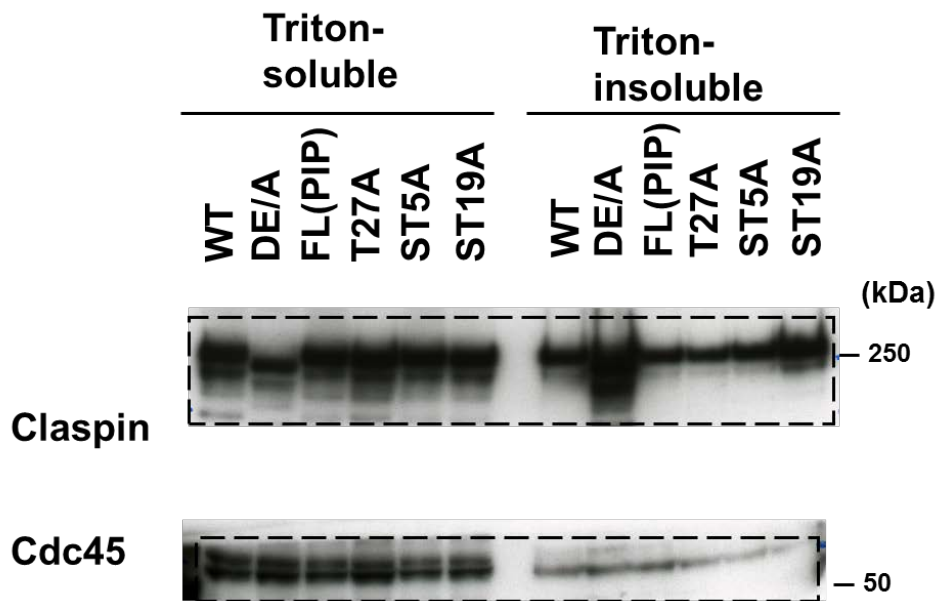

**Supplementary Figure 21. Uncropped scans of the blots.**  
 Uncropped scans of Supplementary Figure 4.

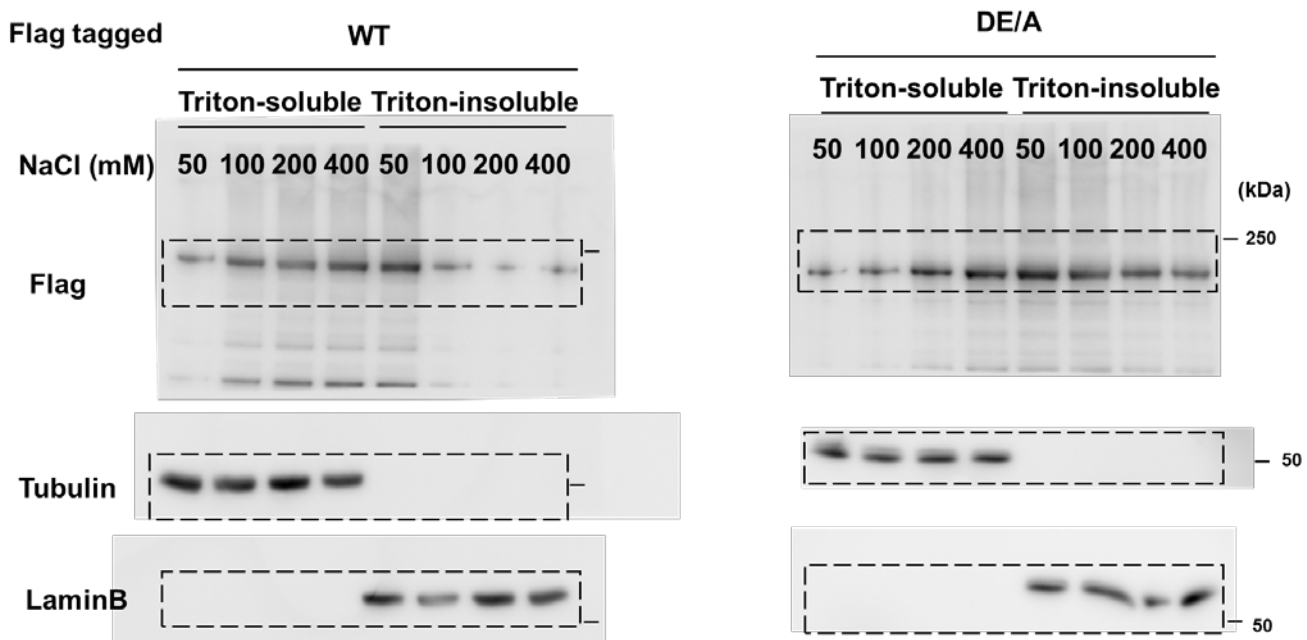

**Supplementary Figure 22. Uncropped scans of the blots.**  
 Uncropped scans of Supplementary Figure 5.

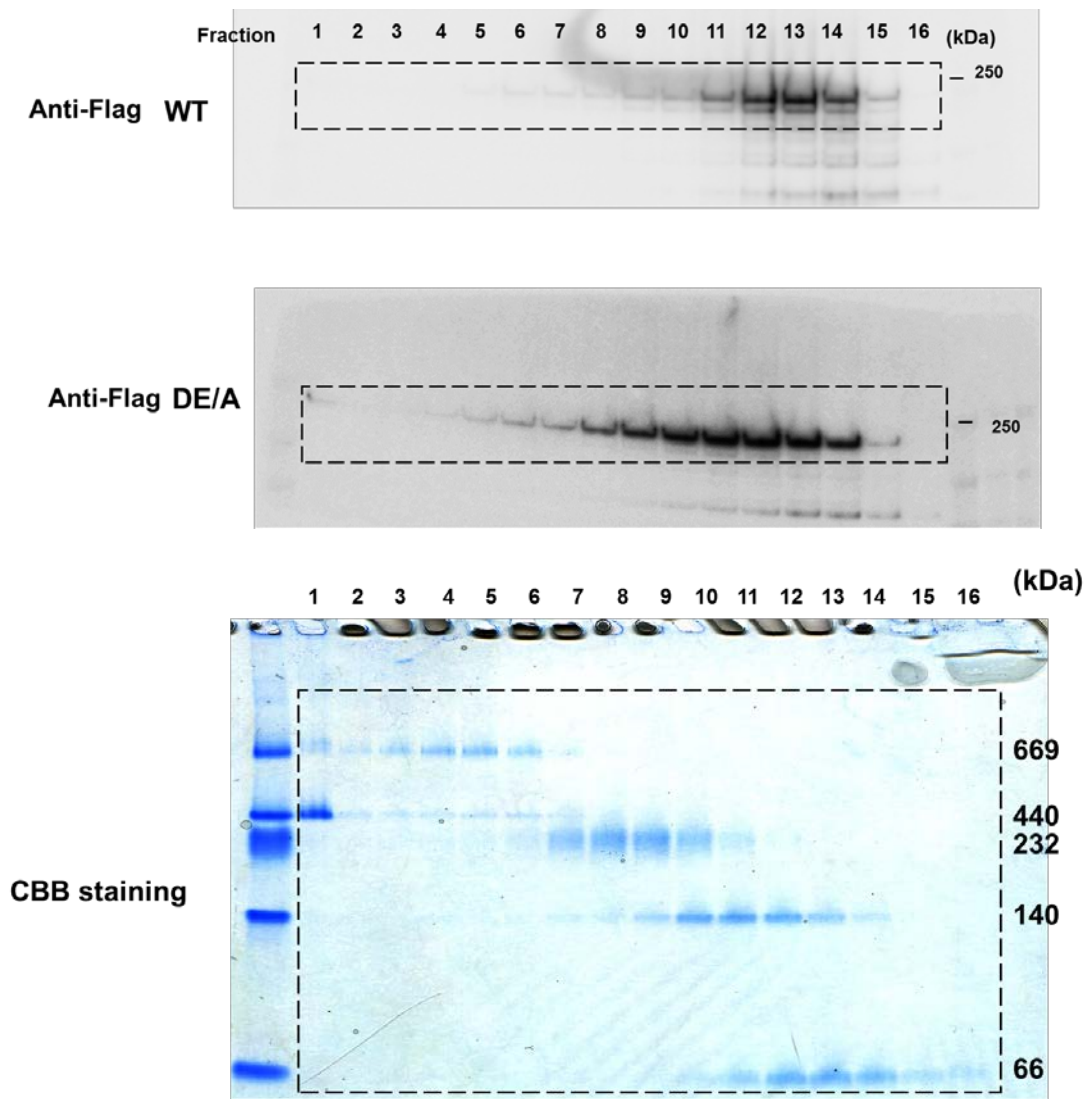

**Supplementary Figure 23. Uncropped scans of the blots.**  
Uncropped scans of Supplementary Figure 6.

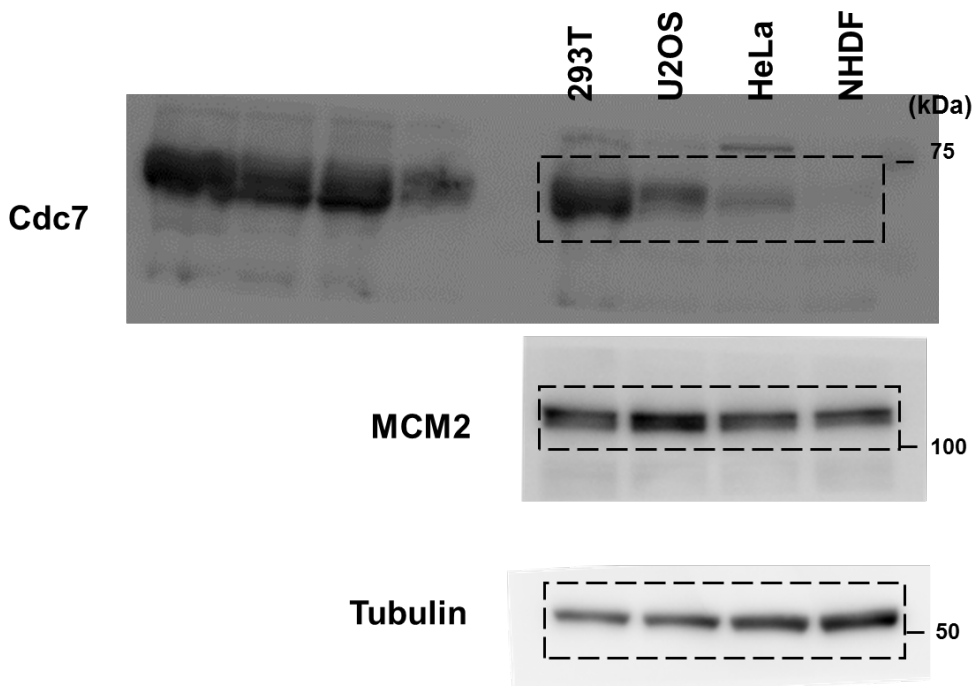

**Supplementary Figure 24. Uncropped scans of the blots.**  
Uncropped scans of Supplementary Figure 7.



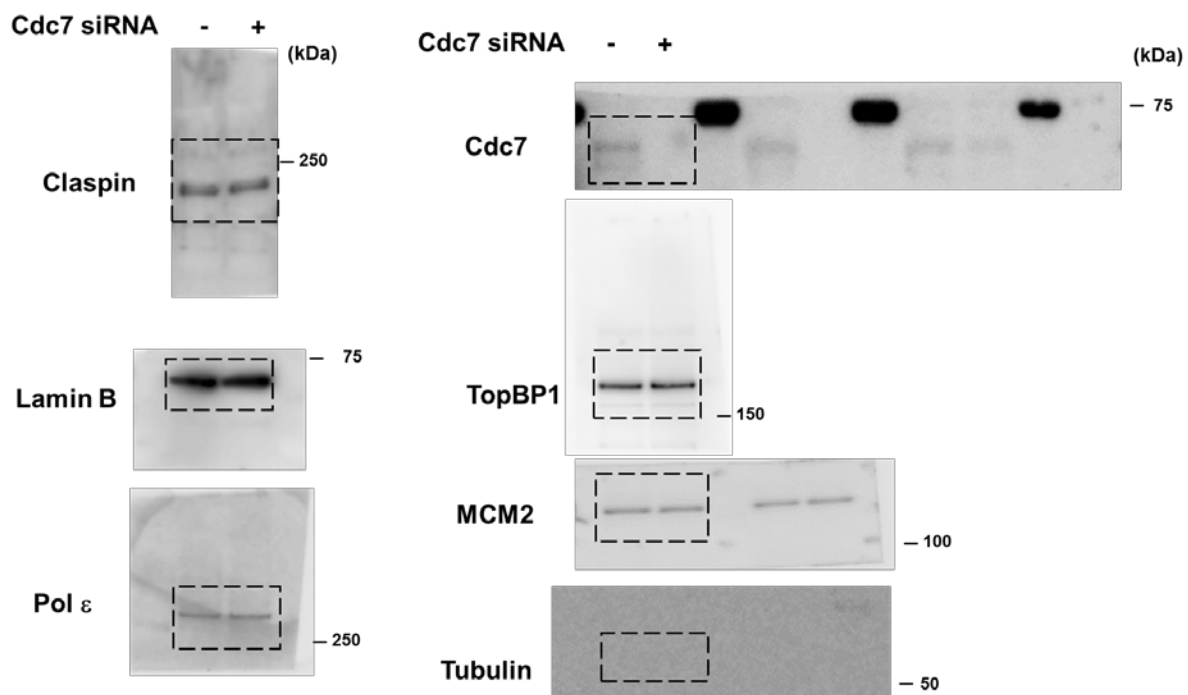

**Supplementary Figure 25. Uncropped scans of the blots.**  
 Uncropped scans of Supplementary Figure 8.

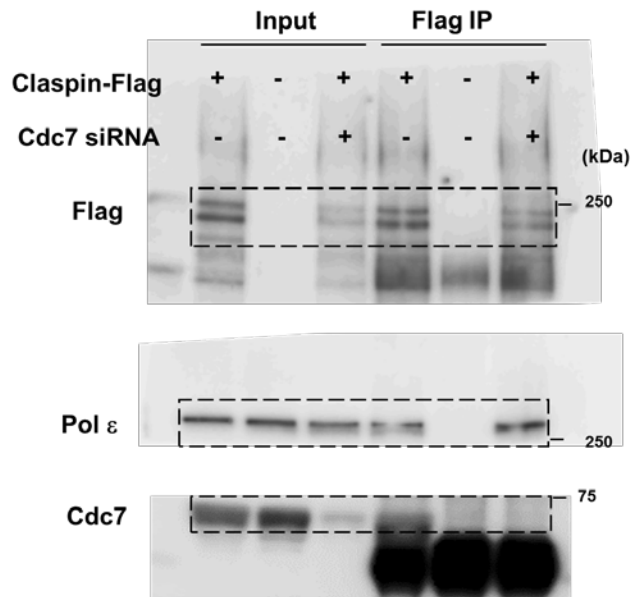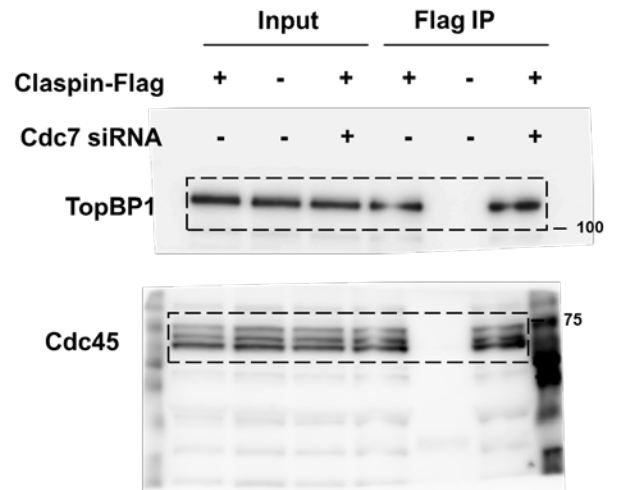

**Supplementary Figure 26. Uncropped scans of the blots.**  
 Uncropped scans of Supplementary Figure 9.

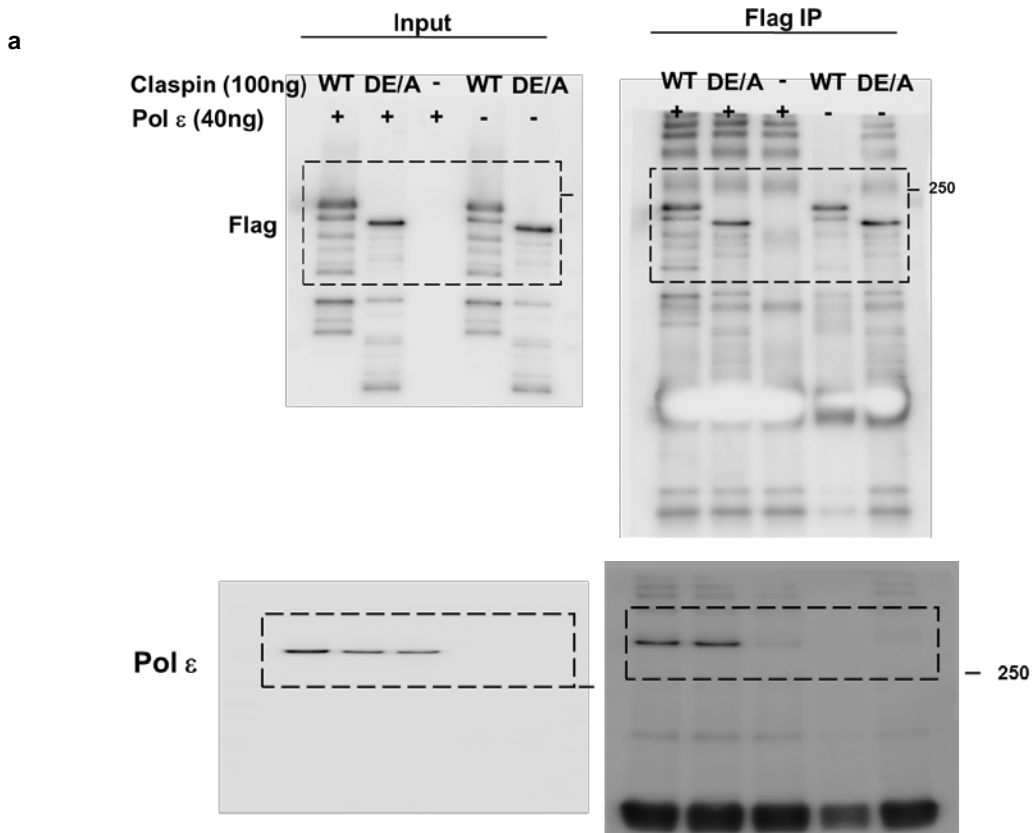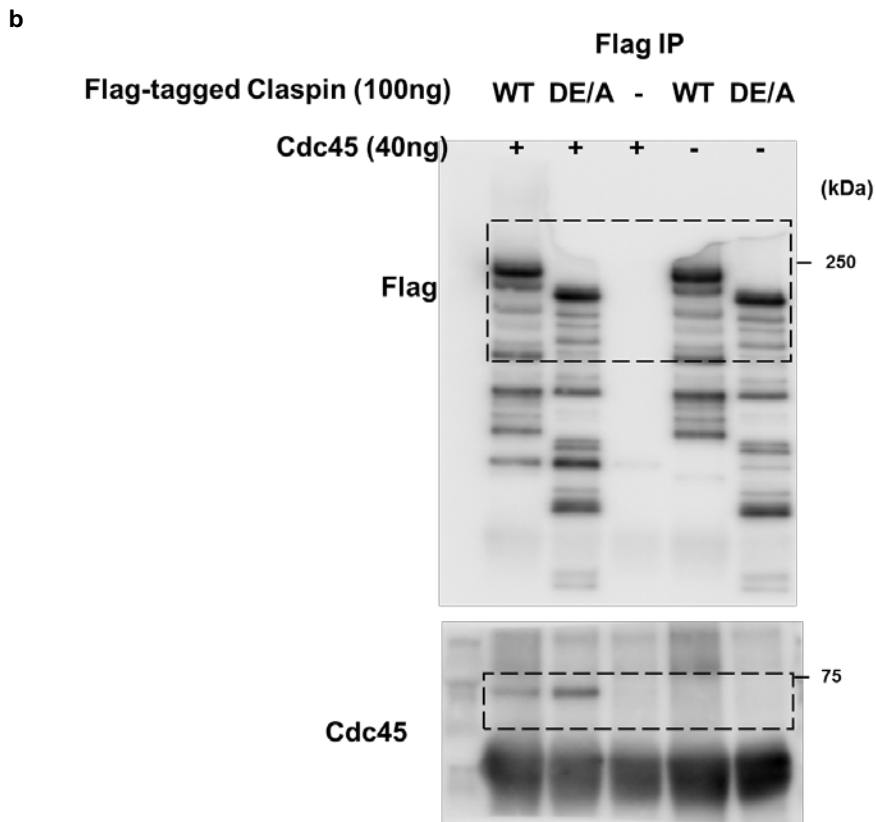

**Supplementary Figure 27. Uncropped scans of the blots.**

(a) Uncropped scans of Supplementary Figure 10a. (b) Uncropped scans of Supplementary Figure 10b.

**SUPPLEMENTARY TABLE 1.****Sequence of the oligonucleotides used in this study**

| <b>Name</b>    | <b>Sequence (5'-3')</b>                |
|----------------|----------------------------------------|
| <b>Primers</b> |                                        |
| FL-F           | ccgctcgagactagtatgacaggcgagggtgggttctg |
| FL-R           | ctagtctagagctctccaaatatttgaagatgc      |
| #2-R           | ctagtctagaagtgtctatgatttctttgtg        |
| #9-F           | ccgctcgaggcaaatactactgaaatgaa          |
| #9-R           | ctagtctagacaatggcaatcgaggcttcaaag      |
| #13-F          | ccgctcgagactagtgccagtatggatgagaatgcc   |
| #13-R          | ctagtctagacagtatcataaactgactgtcc       |
| #14-R          | ctagtctagaaaaagagcctgagcaaagagcaag     |
| #27-R          | acctctagacttttcttgatttgactctgcagttcc   |
| #27N-F         | accggctagcgcagcagtatggatgagaatgcc      |
| #27N-R         | accggctagcctttcttgatttgactctgcagttcc   |
| Cdel1-1-R      | ccgggatccaaaagagcctgagcaaagag          |
| Cdel1-2-F      | ccgggatccgccaagaaagttacagccaaa         |
| Cdel2-1-R      | ccgggatcctttcttgatttgactctgcagttcc     |
| Cdel2-2-F      | ccgggatccgccaagaaagttacagccaaa         |
| Cdel4-1-R      | ccgggatccaaaagagcctgagcaaagag          |
| Cdel4-2-F      | ccgggatcccccacagacaaggaagagga          |
| C-del6-1-R     | ccggctagcaaaaagagcctgagcaaagag         |
| Cdel6-2-F      | ccggctagcatacacatgaaaactatggttgatg     |
| Cdel7-1-R      | ccgggatccaaaagagcctgagcaaagagcaag      |
| Cdel7-2-F      | ccgggatccatacacatgaaaactatggttgatg     |
| Cdel6N-1-1-R   | accggctagccttctgggtagatgtttttca        |
| Cdel6N-2-1-R   | accggctagcctctgatgaggctggagtgga        |
| Cdel6N-3in-F   | accggctagccaggctgaaaaacatctacc         |
| Cdel6N-4in-F   | accggctagccaggatgcctccactccag          |
| Cdel6N-5in-F   | accggctagcgacaaggaagaggaagacga         |
| #2 PIP-1-F     | gctaaaaccgctcatgatgccgccaacgtaaac      |
| #2 PIP-2-R     | ggcggcatcatgagcgggttttagcctcaggcata    |



## REFERENCES

1. Yamazaki, S. *et al.* Rif1 regulates the replication timing domains on the human genome. *EMBO J.* **31**, 3667–3677 (2012).
